# Supplementary material for: Proteomic Analysis ofPTCH1+/− Fibroblast Lysate and Conditioned Culture Media Isolated from the Skin of Healthy Subjects and Nevoid Basal Cell Carcinoma Syndrome Patients
Source: Hindawi journal article supplement (doi:10.1155/2013/794028), 2013-01-01
Supplement: f1 [file 794028.f1.pdf]

**Table 1 Suppl.** - Comparison of peak intensities between NBCCS and controls fibroblast lysates for IMAC30-Cu. For each cluster peak comparison the *p-value* was  $<0.05$ .

| n. | <i>M/Z</i> | NBCCS patients               |          | Control individuals          |          |
|----|------------|------------------------------|----------|------------------------------|----------|
|    |            | <i>Intensity (mean ± SD)</i> |          | <i>Intensity (mean ± SD)</i> |          |
| 1  | 1527       | 99.11                        | ± 50.7   | 41.61                        | ± 10.12  |
| 2  | 1985       | 203.7                        | ± 71     | 110.51                       | ± 14.39  |
| 3  | 2002       | 595.47                       | ± 177.99 | 337.42                       | ± 39.81  |
| 4  | 2017       | 1355.55                      | ± 265.37 | 842.03                       | ± 122.35 |
| 5  | 2037       | 596.46                       | ± 169.45 | 345.54                       | ± 44.8   |
| 6  | 2089       | 53.36                        | ± 9.91   | 24.86                        | ± 1.21   |
| 7  | 2224       | 64.34                        | ± 13.65  | 35.97                        | ± 3.77   |
| 8  | 2254       | 140.29                       | ± 31.44  | 89.55                        | ± 11.85  |
| 9  | 2267       | 203.56                       | ± 26.69  | 130.73                       | ± 19.89  |
| 10 | 2289       | 155.25                       | ± 51.71  | 84.11                        | ± 14.21  |
| 11 | 2518       | 46.63                        | ± 5.43   | 24.72                        | ± 3.85   |
| 12 | 3013       | 98.27                        | ± 44.43  | 41.03                        | ± 5.8    |
| 13 | 3048       | 80.01                        | ± 42.53  | 31.73                        | ± 6.58   |
| 14 | 3274       | 50.57                        | ± 15.31  | 25.41                        | ± 5.31   |
| 15 | 4030       | 26.86                        | ± 12.47  | 12.07                        | ± 1.23   |
| 16 | 4280       | 16.38                        | ± 6.21   | 7.62                         | ± 1.86   |
| 17 | 4790       | 3.99                         | ± 5.79   | 16.65                        | ± 5.48   |
| 18 | 5036       | 11.78                        | ± 5.08   | 3.86                         | ± 0.49   |
| 19 | 6902       | 12.17                        | ± 13.22  | 51.22                        | ± 17.49  |
| 20 | 7017       | 12.11                        | ± 13.84  | 72.56                        | ± 22.3   |
| 21 | 7461       | 4.16                         | ± 6.22   | 18.18                        | ± 0.92   |
| 22 | 8103       | 9.28                         | ± 15.07  | 47.84                        | ± 27.02  |
| 23 | 9170       | 7.83                         | ± 14.77  | 66.57                        | ± 28.51  |
| 24 | 10116      | 1.37                         | ± 1.56   | 7.57                         | ± 5.28   |
| 25 | 11094      | 4.6                          | ± 6.96   | 45.09                        | ± 42.71  |
| 26 | 12346      | 2.39                         | ± 0.99   | 6.85                         | ± 2.28   |
| 27 | 12677      | 1.72                         | ± 2.07   | 6.23                         | ± 3      |
| 28 | 13310      | 3.5                          | ± 6.23   | 23.46                        | ± 5.38   |
| 29 | 13459      | 2.28                         | ± 3.46   | 15.55                        | ± 4.61   |
| 30 | 13670      | 4.92                         | ± 8.36   | 31.49                        | ± 10.97  |
| 31 | 13807      | 25.7                         | ± 38.76  | 159.87                       | ± 68.21  |
| 32 | 13926      | 10.89                        | ± 15.79  | 76.86                        | ± 30.05  |
| 33 | 14032      | 26.04                        | ± 35.43  | 186.96                       | ± 67.15  |
| 34 | 14191      | 7.55                         | ± 11.17  | 56.9                         | ± 15.81  |
| 35 | 14450      | 5.09                         | ± 6.1    | 31.64                        | ± 10.73  |
| 36 | 14688      | 4.7                          | ± 5.35   | 24.11                        | ± 7.41   |
| 37 | 14810      | 3.77                         | ± 4.94   | 20.35                        | ± 8.1    |
| 38 | 15076      | 2.52                         | ± 3.22   | 16.22                        | ± 7.03   |
| 39 | 15735      | 2.71                         | ± 2.13   | 7.4                          | ± 3.34   |
| 40 | 15960      | 1.87                         | ± 2.01   | 11.59                        | ± 3.65   |
| 41 | 16986      | 1.54                         | ± 2.01   | 8.59                         | ± 2.69   |
| 42 | 17131      | 1.23                         | ± 1.4    | 5.17                         | ± 1.4    |
| 43 | 17657      | 1.58                         | ± 1.97   | 8.8                          | ± 3.42   |
| 44 | 22233      | 0.55                         | ± 0.67   | 2.3                          | ± 0.46   |
| 45 | 26882      | 0.23                         | ± 0.18   | 1.03                         | ± 0.53   |
| 46 | 27908      | 0.13                         | ± 0.11   | 0.97                         | ± 0.38   |
| 47 | 29566      | 0.15                         | ± 0.15   | 0.74                         | ± 0.25   |
| 48 | 34364      | 0.153                        | ± 0.086  | 0.324                        | ± 0.119  |
| 49 | 35985      | 0.394                        | ± 0.231  | 0.767                        | ± 0.263  |
| 50 | 38580      | 0.111                        | ± 0.102  | 0.278                        | ± 0.119  |
| 51 | 44048      | 0.075                        | ± 0.028  | 0.034                        | ± 0.014  |
| 52 | 47326      | 0.123                        | ± 0.038  | 0.073                        | ± 0.007  |
| 53 | 66569      | 0.046                        | ± 0.028  | 0.003                        | ± 0.002  |
| 54 | 70842      | 0.039                        | ± 0.024  | 0.011                        | ± 0.001  |
| 55 | 77999      | 0.028                        | ± 0.025  | 0.003                        | ± 0.001  |
| 56 | 107401     | 0.077                        | ± 0.02   | 0.131                        | ± 0.038  |
